# Supplementary material for: A TLR–CXCL1 pathway in DRG neurons induces neutrophil accumulation in the DRG and mechanical allodynia in EAE mice
Source: PubMed Central journal article supplement (PMC6700073; doi:10.1038/s41598-019-48558-7), 2019-08-19
Supplement: 41598_2019_48558_MOESM1_ESM.pdf [file 41598_2019_48558_MOESM1_ESM.pdf]

**A TLR4-CXCL1 pathway in DRG neurons induces neutrophil accumulation in the DRG and mechanical allodynia in EAE mice**

Jing Zhang<sup>1</sup>, Yuka Harada<sup>1</sup>, and Yoshinori Hayashi<sup>1,2</sup>

<sup>1</sup>Department of Aging Science and Pharmacology, Faculty of Dental Science, Kyushu University Fukuoka, Japan

<sup>2</sup>Department of Physiology, Nihon University School of Dentistry, 1-8-13 Kandasurugadai, Chiyoda-ku, Tokyo, Japan

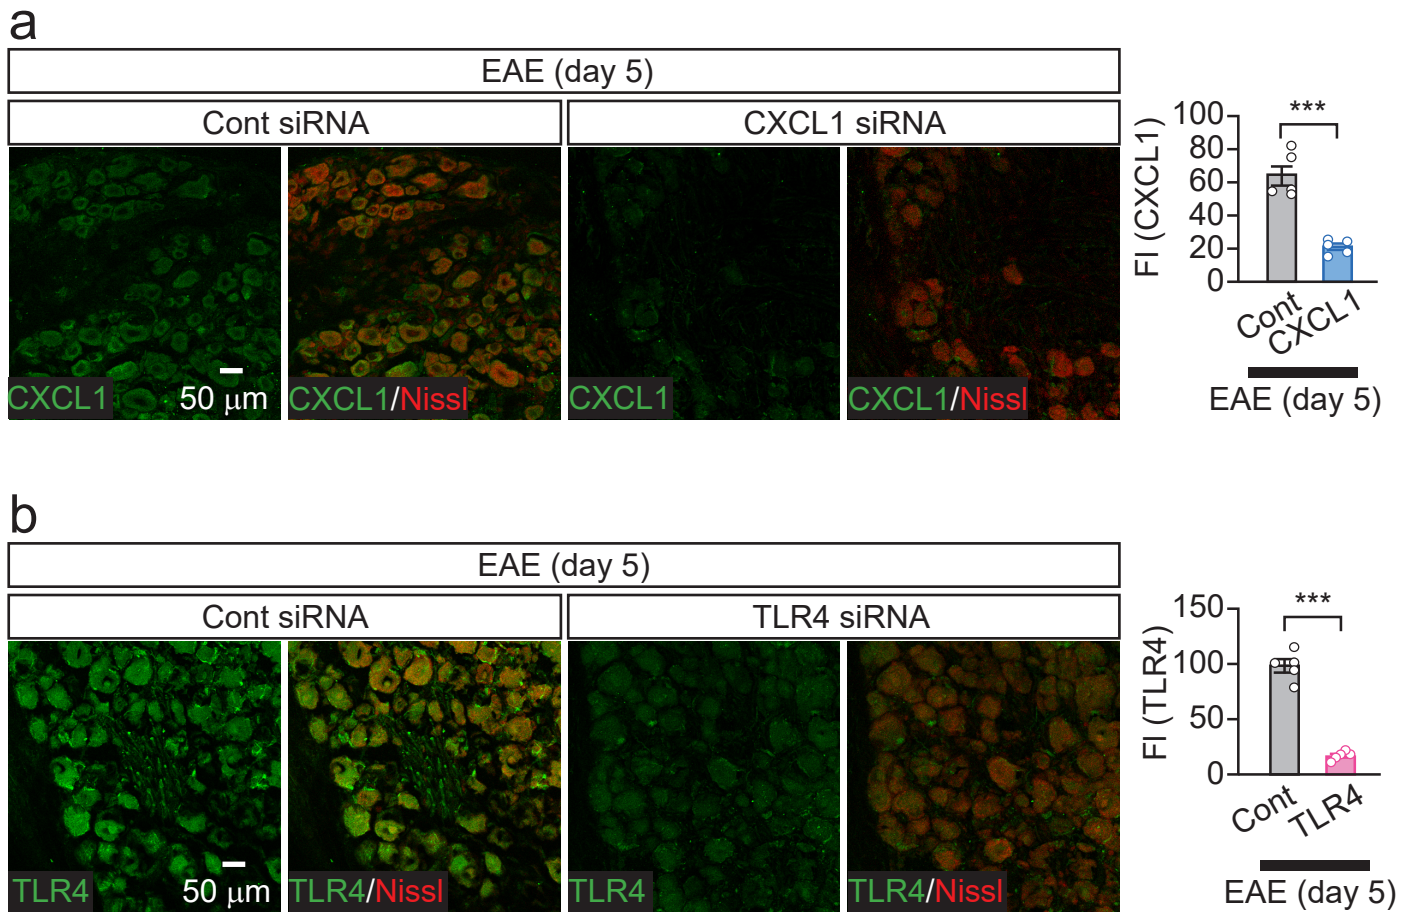

Supplementary Figure 1. Fluorescent images for CXCL1 (**a**) and TLR4 (**b**) in the DRG 5 days after MOG<sub>35-55</sub> immunization in CXCL1- or TLR4-knockdown mice. Columns represent statistical data of fluorescence intensity (FI) of CXCL1 (**a**) and TLR4 (**b**) in DRG neurons. Green fluorescence indicates CXCL1 or TLR4. Red fluorescence indicates Nissl.  $n = 5$  mice per group, unpaired  $t$ -test, \*\*\* $P = 0.001$  (**a**) and \*\*\* $P < 0.001$  (**b**). All values are mean  $\pm$  SEM.

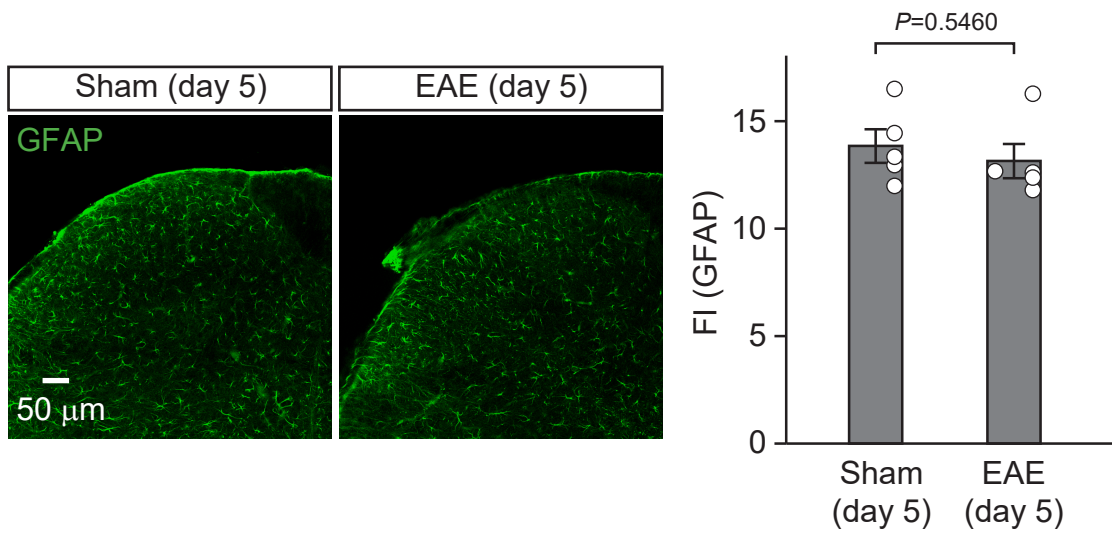

Supplementary Figure 2. Fluorescent images for GFAP in the L5 spinal dorsal horn 5 days after MOG<sub>35-55</sub> immunization. Columns represent statistical data of fluorescence intensity (FI) of GFAP in the spinal dorsal horn. n = 5 mice per group, unpaired *t*-test, *P* = 0.5460. All values are mean ± SEM.

Figure 1d

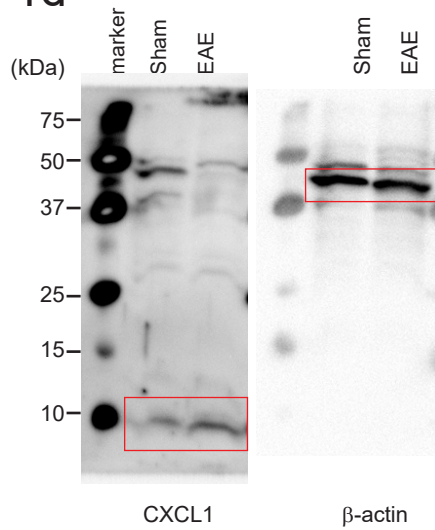

Figure 2e

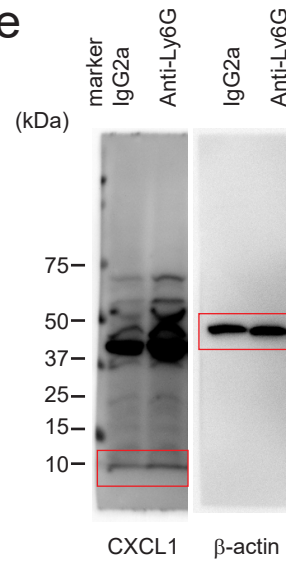

Figure 3b

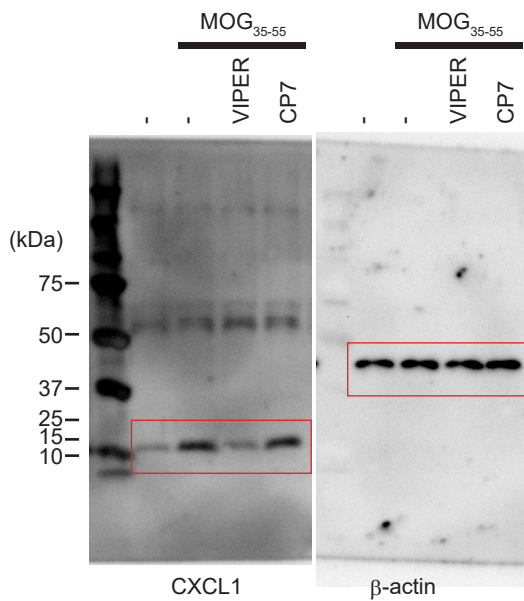

Figure 4a

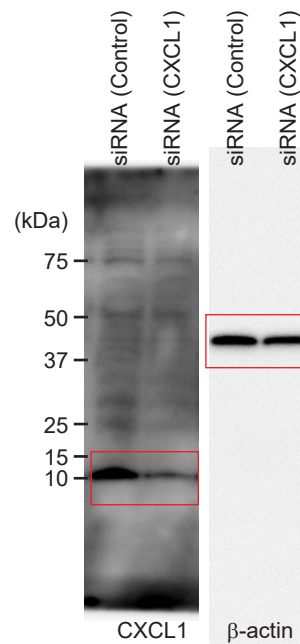

Figure 4b

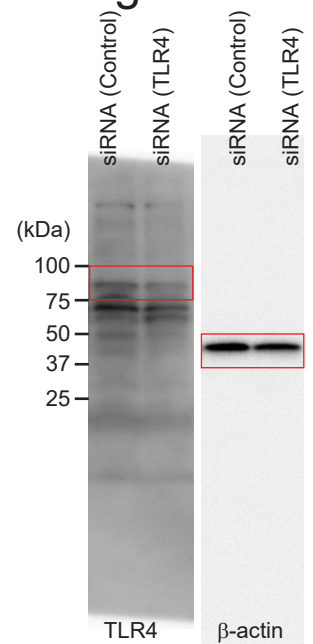

Figure 4f

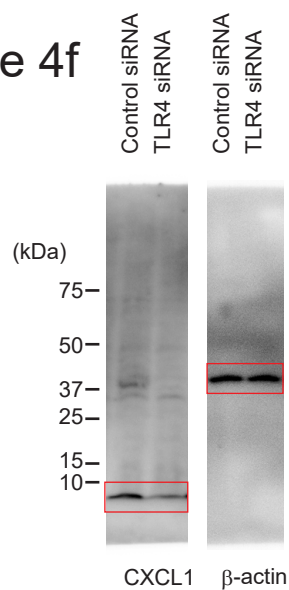

Figure 4g

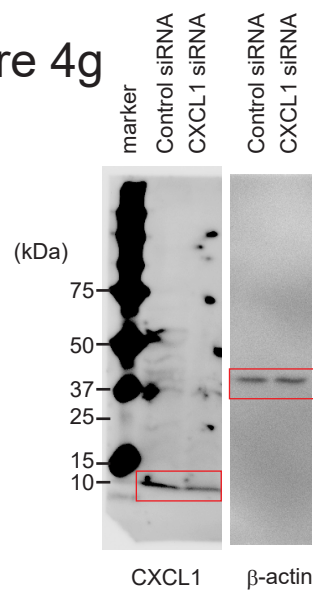

Supplementary Figure 3. Full-length images of blots and gels presented in Figures 1-4. Rectangles indicate the regions used in the figures.
